# Supplementary material for: Production of Recombinant Zika Virus Envelope Protein by Airlift Bioreactor as a New Subunit Vaccine Platform
Source: MDPI journal article supplement (doi:10.3390/ijms241813955), 2023-09-11
Supplement: s1 [file s1]

## Supplementary File S1: Cytokine primers sequences

| Primer gene   | Forward Primer            | Reverse Primer            |
|---------------|---------------------------|---------------------------|
| IL-1 $\beta$  | CAACCAACAAGTGATATTCTCCATG | GATCCACACTCTCCAGCTGCA     |
| IL-2          | CCTGAGCAGGATGGAGAATTACA   | TCCAGAACATGCCGCAGAG       |
| IL-4          | ACAGGAGAAGGGACGCCAT       | GAAGCCCTACAGACGAGCTCA     |
| IL-5          | AGCACAGTGGTGAAAGAGACCTT   | TCCAATGCATAGCTGGTGATTT    |
| IL-6          | GAGGATACCACTCCCAACAGACC   | AAGTGCATCATCGTTGTTTCATACA |
| INF- $\gamma$ | TCAAGTGGCATAGATGTGGAAGAA  | TGGCTCTGCAGGATTTTCATG     |
| TGF- $\beta$  | TGACGTCCTGGAGTTGTACGG     | GGTTCATGTCATGGATGGTGC     |
| IL-10         | GGTTGCCAAGCCTTATCGGA      | ACCTGCTCCACTGCCTTGCT      |
| IL-17         | ACCGCAATGAAGACCCTGAT      | TCCCTCCGCATTGACACA        |
| IL-35         | CCTTTGTGGCTGAGCGAATC      | CACCTGGCGGAAGTGAGA        |
| GM-CSF        | GCCATCAAAGAAGCCCTGAA      | GCGGGTCTGCACACATGTTA      |
| GAPDH         | CCTTCCGTGTTCTACCC         | GCCCTCAGATGCCTGCT         |

**Supplementary File 1.** Primer sequences for mRNA expression of IL-1 $\beta$ , IL-6, GM-CSF, IL-2, IL-4, IL-17, INF- $\gamma$ , IL-10, IL-35, and TGF- $\beta$ .
